# Supplementary material for: Mechanisms of integrin and filamin binding and their interplay with talin during early focal adhesion formation
Source: Royal Society of Chemistry journal article supplement (doi:10.1039/c5ib00133a), 2015-01-01
Supplement: c5ib00133a1.pdf [file c5ib00133a1.pdf]

**Supplementary Information:**

| <b>Table S1 – The average energy of interaction across each trial of Model 1 and Model 2</b> |                                                                                  |         |
|----------------------------------------------------------------------------------------------|----------------------------------------------------------------------------------|---------|
| Trial Number                                                                                 | Average Interaction Energy Between Integrin and CD Face of FLNa21 (kcal/mol)     |         |
|                                                                                              | Model 1                                                                          | Model 2 |
| 1                                                                                            | -9                                                                               | 7       |
| 2                                                                                            | 1                                                                                | -4      |
| 3                                                                                            | -15                                                                              | -67     |
| 4                                                                                            | -8                                                                               | 0.14    |
| 5                                                                                            | 0                                                                                | -42     |
|                                                                                              | Average Interaction Energy Between Integrin and Autoinhibitory FLNa20 (kcal/mol) |         |
|                                                                                              | Model 1                                                                          | Model 2 |
| 1                                                                                            | -7                                                                               | -40     |
| 2                                                                                            | -20                                                                              | -33     |
| 3                                                                                            | -64                                                                              | -42     |
| 4                                                                                            | -5                                                                               | -11     |
| 5                                                                                            | 1                                                                                | -103    |

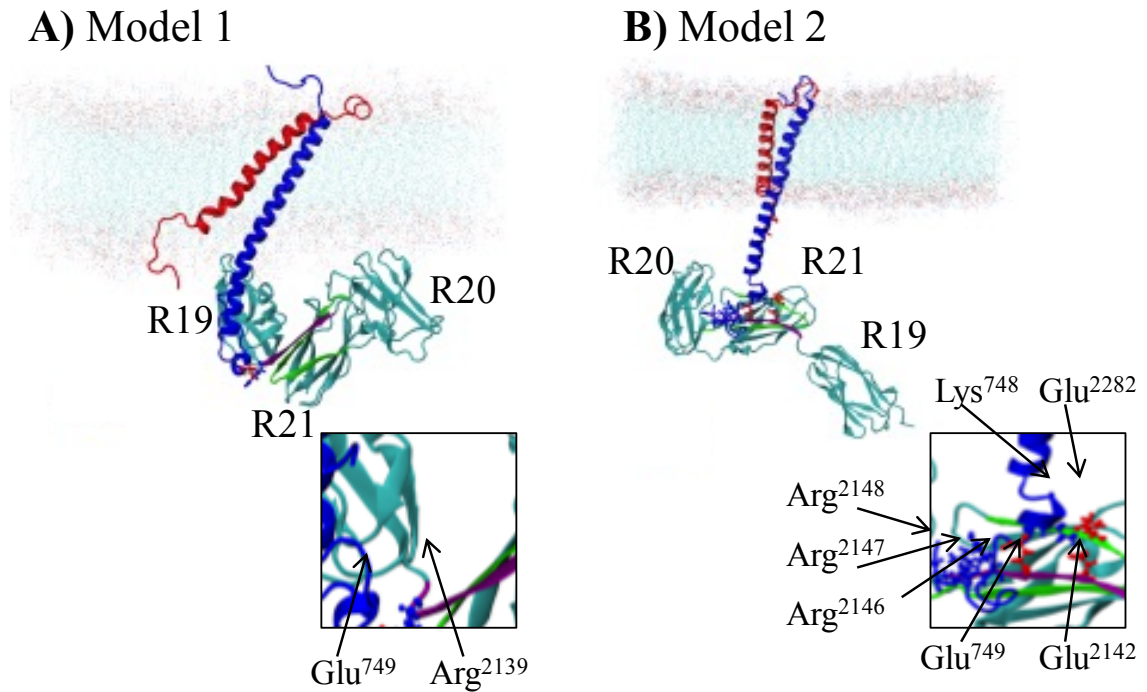

. **Figure S1– A)** Model 1 reveals one stable interaction from one of five trials. This interaction is between the integrin  $\beta_3$  cytoplasmic tail and the auto-inhibitory strand at Glu<sup>749</sup> and Arg<sup>2139</sup>, respectively. **B)** Model 2 reveals two interactions, and integrin interacts more strongly at the auto-inhibitory strand than at the IgFLNa21 CD face in all four of five trials that demonstrated binding. The stronger interaction is between Lys<sup>748</sup> and Glu<sup>2142</sup> on the auto-inhibitory strand or Glu<sup>2282</sup> on the IgFLNa21 CD face. There is also a weak interaction between Glu<sup>749</sup> and a basic region consisting of Arg<sup>2146-2148</sup>. Acidic residues are shown in red, basic residues in blue. The auto-inhibitory strand is depicted in purple and the IgFLNa21 CD face in green.

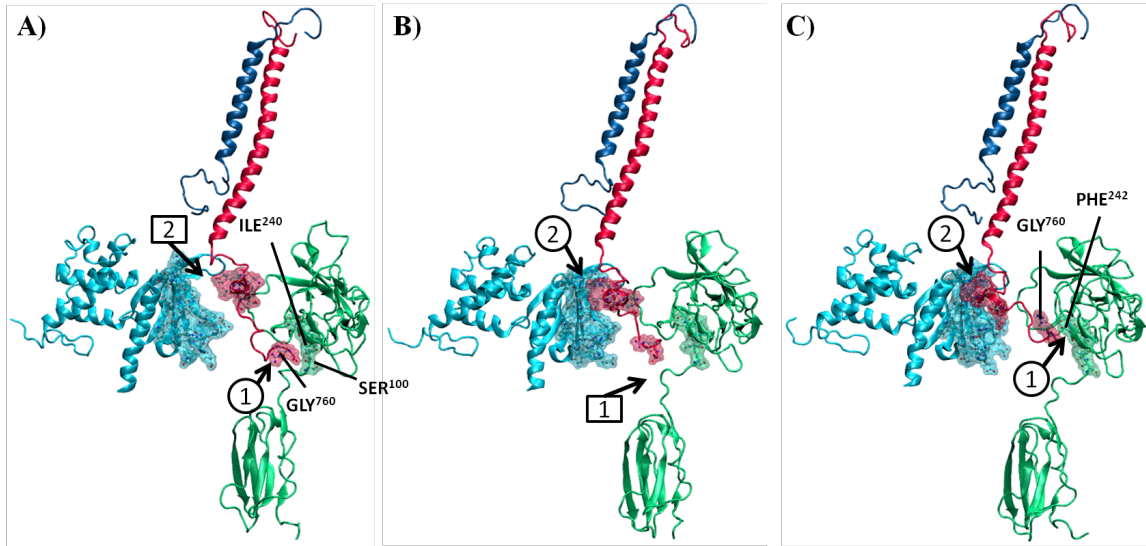

**Figure S2 – The dynamics of filamin-bound simulations:** A) In the beginning of simulations, GLY<sup>760</sup> of β-integrin is associated with both SER<sup>100</sup> and ILE<sup>240</sup> of the distal portion of the CD face with respect to the lipid membrane (site 1). However, the small α-helix of β-integrin tail is not yet engaged with talin (site 2). B) As β-integrin binds talin, GLY<sup>760</sup> is separated and pushed closer to the membrane and C) associates with PHE<sup>242</sup> located on the proximal region of the filamin CD face. Circles and squares indicate association and dissociation, respectively.
